# Supplementary material
Source: PubMed Central journal article supplement (PMC4522951)
Supplement: Supp_Table1.pdf [file Supp_Table1.pdf]

## Supplementary Data

SUPPLEMENTARY TABLE S1. HISTOLOGICAL GRADING  
SCALE FOR ARTICULAR CARTILAGE INJURIES

| <i>Category</i>                  | <i>Points</i> |
|----------------------------------|---------------|
| Cell morphology                  |               |
| Hyaline cartilage                | 4             |
| Mostly hyaline cartilage         | 3             |
| Mostly fibrocartilage            | 2             |
| Mostly noncartilage              | 1             |
| Noncartilage only                | 0             |
| Matrix staining                  |               |
| Normal                           | 3             |
| Slightly reduced                 | 2             |
| Markedly reduced                 | 1             |
| No staining                      | 0             |
| Surface regularity               |               |
| Smooth 100–75%                   | 3             |
| Moderate 75–50%                  | 2             |
| Irregular 50–25%                 | 1             |
| Severe irregularity              | 0             |
| Thickness of cartilage           |               |
| >2/3 depth                       | 2             |
| 1/3–2/3 depth                    | 1             |
| <1/3 depth                       | 0             |
| Integration with naive cartilage |               |
| Both edges integrated            | 2             |
| One edge integrated              | 1             |
| Neither edge integrated          | 0             |
